# Supplementary material for: CO oxidation on Rh-doped hexadecagold clusters
Source: Royal Society of Chemistry journal article supplement (doi:10.1039/c6cy02277d), 2016-11-29
Supplement: c6cy02277d1.pdf [file c6cy02277d1.pdf]

## **CO oxidation on Rh-doped Hexadecagold Clusters**

**Jin-Xun Liu, Zhiling Liu, Ivo A.W. Filot, Yaqiong Su, Ionut Tranca, Emiel J.M. Hensen**

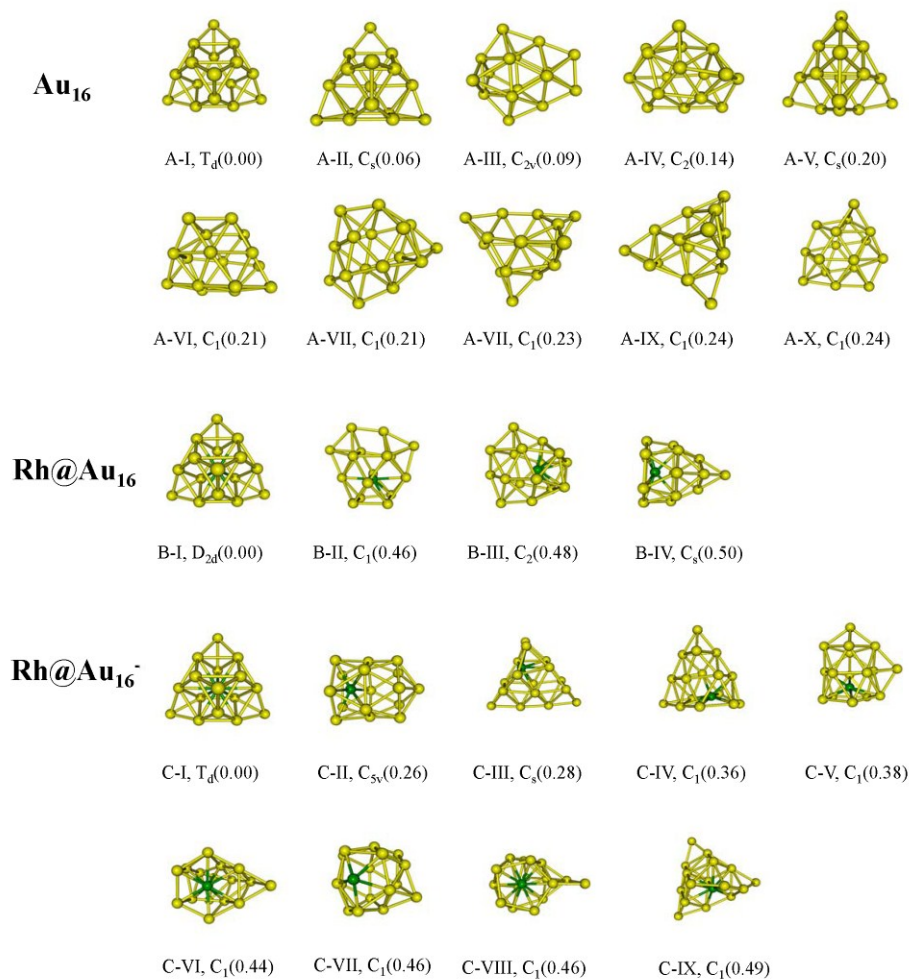

**Figure S1.** Structures of the candidates for the lowest-energy cluster of Au<sub>16</sub>, neutral and anionic Rh@Au<sub>16</sub> clusters by genetic algorithm. The energy values (in eV) beneath each isomer are the relative energy with respect to the lowest-lying isomer calculated at the corresponding of PBE level of DFT calculations.

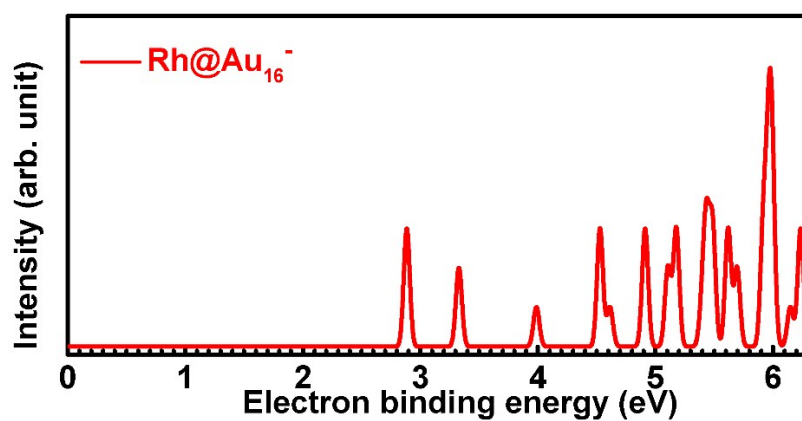

**Figure S2.** Calculated photoelectron spectra of Rh@Au<sub>16</sub><sup>-</sup> anionic cluster.

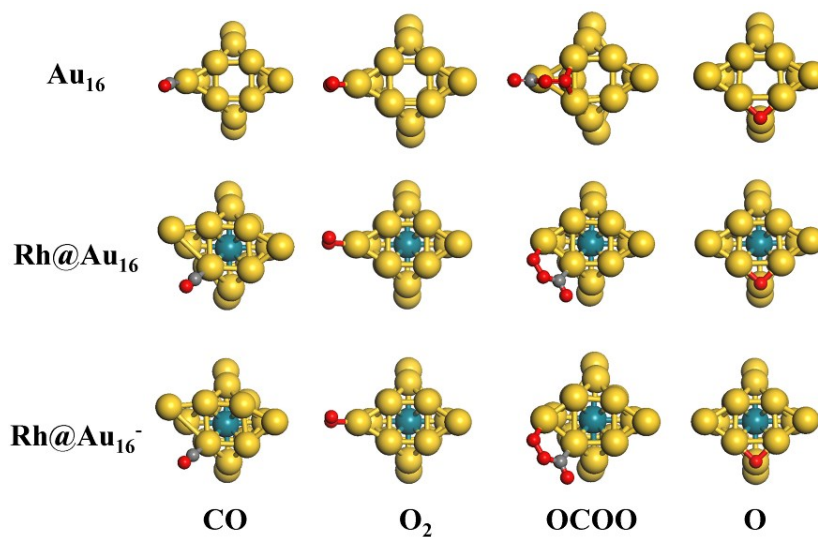

**Figure S3.** Optimized adsorption geometries involved in CO oxidation on  $\text{Au}_{16}$ ,  $\text{Rh@Au}_{16}$  and  $\text{Rh@Au}_{16}^-$  clusters. Yellow, cyan, grey and red balls are Au, Rh, C and O atoms.

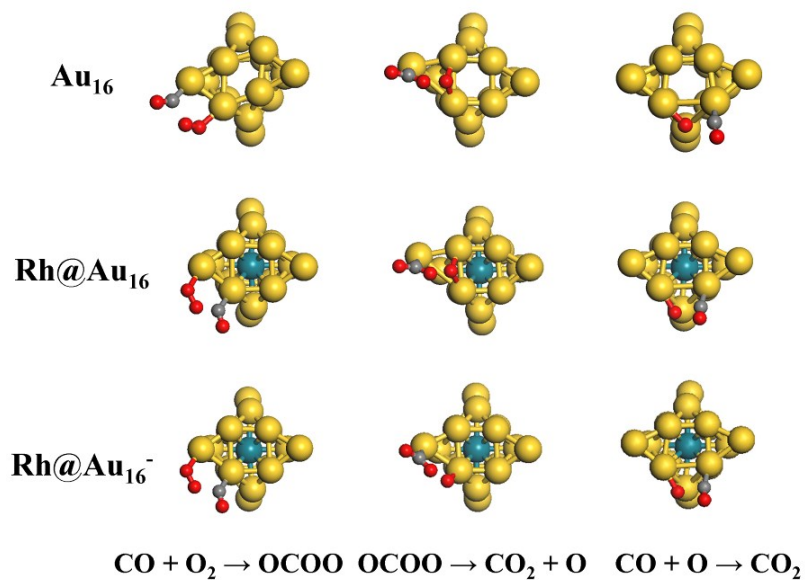

**Figure S4.** Optimized transition states for CO oxidation on  $\text{Au}_{16}$ ,  $\text{Rh@Au}_{16}$  and  $\text{Rh@Au}_{16}^-$  clusters. Yellow, cyan, grey and red balls are Au, Rh, C and O atoms.

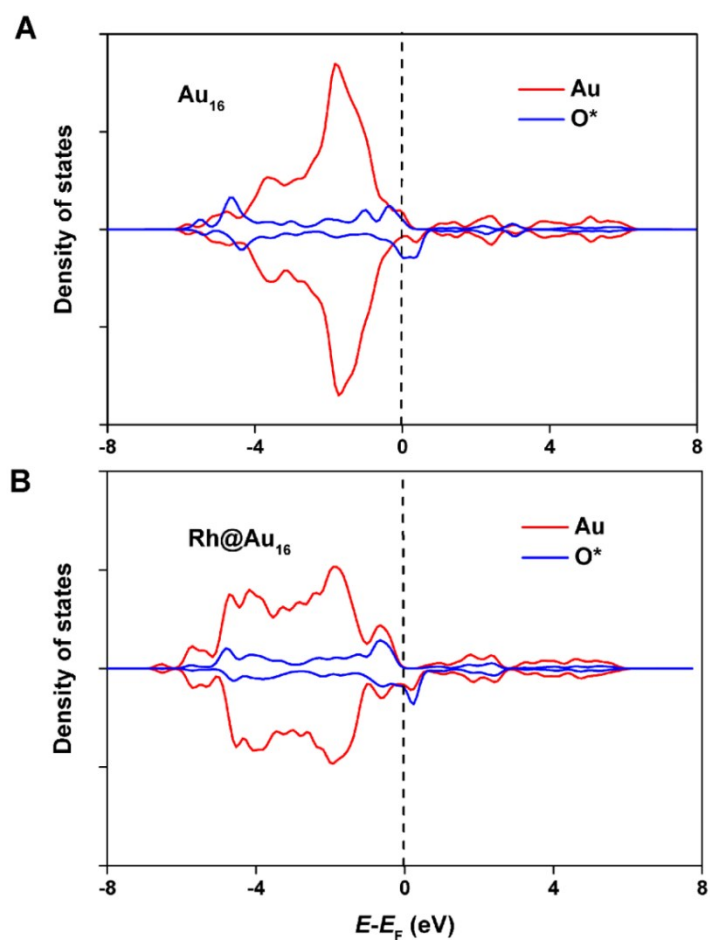

**Figure S5.** The projected density of states (PDOS) of the O\* atom in the transition state on Au<sub>16</sub> (A) and Rh@Au<sub>16</sub> (B) clusters. The blue and red lines are the PDOS for the adsorbed O\* atom and the corresponding two Au atoms, respectively.

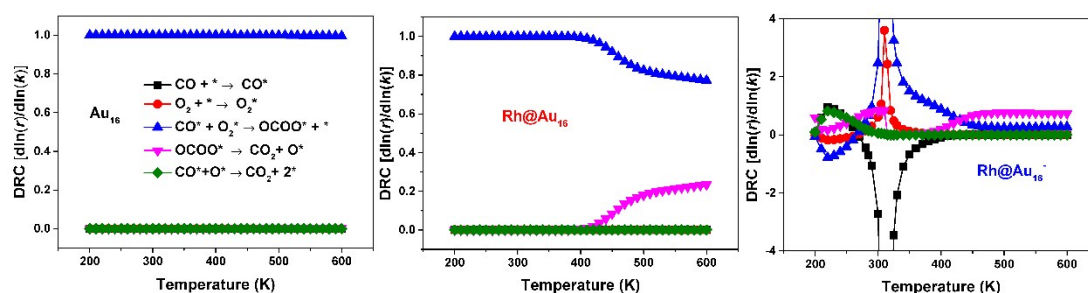

**Figure S6.** The degree of rate control (DRC) for CO oxidation as a function of the temperature (in K) on Au<sub>16</sub>, Rh@Au<sub>16</sub> and Rh@Au<sub>16</sub><sup>-</sup> clusters.

**Table S1.** Calculated vibration frequency (in  $\text{cm}^{-1}$ ) for  $\text{Au}_{16}$ ,  $\text{Rh@Au}_{16}$  and  $\text{Rh@Au}_{16}^-$  clusters.

There are 42 and 45 real frequencies for  $\text{Au}_{16}$  and Rh-doped  $\text{Au}_{16}$  clusters.

| Au16                 |     |     |     |     |     |     |     |
|----------------------|-----|-----|-----|-----|-----|-----|-----|
| 14                   | 14  | 14  | 18  | 18  | 18  | 35  | 35  |
| 44                   | 44  | 44  | 58  | 58  | 58  | 60  | 60  |
| 60                   | 68  | 68  | 68  | 84  | 84  | 84  | 85  |
| 85                   | 86  | 99  | 99  | 99  | 101 | 109 | 109 |
| 111                  | 111 | 111 | 147 | 147 | 147 | 173 | 173 |
| 173                  | 188 |     |     |     |     |     |     |
| Rh@Au16              |     |     |     |     |     |     |     |
| 22                   | 28  | 31  | 32  | 36  | 36  | 38  | 38  |
| 42                   | 45  | 51  | 56  | 56  | 57  | 57  | 59  |
| 60                   | 71  | 72  | 72  | 76  | 76  | 79  | 79  |
| 81                   | 82  | 83  | 83  | 86  | 102 | 103 | 104 |
| 104                  | 104 | 109 | 134 | 138 | 138 | 150 | 150 |
| 152                  | 173 | 173 | 175 | 178 |     |     |     |
| Rh@Au16 <sup>-</sup> |     |     |     |     |     |     |     |
| 20                   | 31  | 31  | 33  | 33  | 33  | 42  | 42  |
| 42                   | 44  | 44  | 53  | 53  | 53  | 62  | 62  |
| 62                   | 72  | 72  | 72  | 79  | 79  | 79  | 83  |
| 83                   | 83  | 85  | 85  | 85  | 102 | 102 | 102 |
| 102                  | 102 | 111 | 133 | 133 | 133 | 150 | 150 |
| 150                  | 171 | 180 | 180 | 180 |     |     |     |

**Table S2.** Calculated binding energies (in eV) of the intermediates involved in CO oxidation reaction on  $\text{Au}_{16}$ ,  $\text{Rh@Au}_{16}$  and  $\text{Rh@Au}_{16}^-$  clusters. All the binding energies are calculated with respect to the corresponding gaseous free molecule except for OCOO with respect to  $\text{CO}+\text{O}_2$  in the gas phase.

| Cluster               | CO    | O     | O <sub>2</sub> | OCOO  |
|-----------------------|-------|-------|----------------|-------|
| $\text{Au}_{16}$      | -0.70 | -0.81 | -0.14          | -1.07 |
| $\text{Rh@Au}_{16}$   | -0.86 | -0.46 | -0.27          | -1.03 |
| $\text{Rh@Au}_{16}^-$ | -0.85 | -0.39 | -0.34          | -1.34 |

**Table S3.** Calculated elementary reaction barriers ( $E_f$  and  $E_b$ , in eV) and the distance ( $d^{TS}$ , in Å) between the two reacting fragments at the transition state involved in CO oxidation reaction on  $Au_{16}$ ,  $Rh@Au_{16}$  and  $Rh@Au_{16}^-$  clusters.  $E_f$  and  $E_b$  are the forward and backward barriers, respectively.

| Cluster        | CO + O <sub>2</sub> → OCOO |       |          | OCOO → CO <sub>2</sub> + O |       |          | CO + O → CO <sub>2</sub> |       |          |
|----------------|----------------------------|-------|----------|----------------------------|-------|----------|--------------------------|-------|----------|
|                | $E_f$                      | $E_b$ | $d^{TS}$ | $E_f$                      | $E_b$ | $d^{TS}$ | $E_f$                    | $E_b$ | $d^{TS}$ |
| $Au_{16}$      | 0.45                       | 0.68  | 1.85     | 0.39                       | 3.27  | 1.85     | 0.61                     | 2.24  | 2.82     |
| $Rh@Au_{16}$   | 0.34                       | 0.25  | 1.72     | 0.19                       | 2.76  | 1.71     | 0.45                     | 2.28  | 2.21     |
| $Rh@Au_{16}^-$ | 0.17                       | 0.32  | 1.99     | 0.37                       | 2.56  | 1.78     | 0.33                     | 2.23  | 2.26     |
